# Supplementary material
Source: publisher site journal article supplement (https://en-cdn.bio-protocol.org/attached/file/20200409/3613%20Supplemental.docx)
Supplement: Supplementary file 1 [file 3613%20Supplemental.docx]

**Supplemental materials**

**Table 1. Molecular weight of FAs and their methyl esters.** FA/FAME molecular weight ratios are used for conversion of FAME amounts to FA amounts (see Table 3).

| **Fatty acid** | **FA** | | **FAME** | | **FA/FAME** |
| --- | --- | --- | --- | --- | --- |
| Formula | Molecular weight | Formula | Molecular weight |
| C16:0 | C16H32O2 | 256.424 | C17H34O2 | 270.450 | 0.948 |
| C16:1 n-7 | C16H30O2 | 254.408 | C17H32O2 | 268.435 | 0.948 |
| C17:0 | C17H34O2 | 270.450 | C18H36O2 | 284.477 | 0.951 |
| C17:1 n-7 | C17H32O2 | 268.435 | C18H34O2 | 282.461 | 0.950 |
| C18:0 | C18H36O2 | 284.477 | C19H38O2 | 298.504 | 0.953 |
| C18:1 n-9 cis/C18:1 n-9 trans | C18H34O2 | 282.461 | C19H36O2 | 296.488 | 0.953 |
| C18:2 n-6 cis/C18:2 n-6 trans | C18H32O2 | 280.445 | C19H34O2 | 294.472 | 0.952 |
| C18:3 n-6 | C18H30O2 | 278.429 | C19H32O2 | 292.456 | 0.952 |
| C18:3 n-3 | C18H30O2 | 278.429 | C19H32O2 | 292.456 | 0.952 |
| C20:0 | C20H40O2 | 312.530 | C21H42O2 | 326.557 | 0.957 |
| C20:1 n-9 | C20H38O2 | 310.514 | C21H40O2 | 324.541 | 0.957 |
| C20:2n-6 | C20H36O2 | 308.498 | C21H38O2 | 322.525 | 0.957 |
| C20:3 n-6 | C20H34O2 | 306.483 | C21H36O2 | 320.509 | 0.956 |
| C21:0 | C21H42O2 | 326.557 | C22H44O2 | 340.583 | 0.959 |
| C20:4 n-6 | C20H32O2 | 304.467 | C21H34O2 | 318.493 | 0.956 |
| C20:3 n-3 | C20H34O2 | 306.483 | C21H36O2 | 320.509 | 0.956 |
| C20:5 n-3 | C20H30O2 | 302.451 | C21H32O2 | 316.477 | 0.956 |
| C22:0 | C22H44O2 | 340.583 | C23H46O2 | 354.610 | 0.960 |
| C22:1 n-9 | C22H42O2 | 338.567 | C23H44O2 | 352.594 | 0.960 |
| C22:2 n-6 | C22H40O2 | 336.552 | C23H42O2 | 350.578 | 0.960 |
| C23:0 | C23H46O2 | 354.610 | C24H48O2 | 368.637 | 0.962 |
| C24:0 | C24H48O2 | 368.637 | C25H50O2 | 382.663 | 0.963 |
| C22:6 n-3 | C22H32O2 | 328.488 | C23H34O2 | 342.515 | 0.959 |
| C24:1 n-9 | C24H46O2 | 366.621 | C25H48O2 | 380.647 | 0.963 |
| C22:4 n-6 | C22H36O2 | 332.520 | C23H38O2 | 346.546 | 0.960 |
| C22:5 n-6 | C22H34O2 | 330.504 | C23H36O2 | 344.531 | 0.959 |
| C22:5 n-3 | C22H34O2 | 330.504 | C23H36O2 | 344.531 | 0.959 |
